# Supplementary material for: Comprehensive assessment of per and polyfluoroalkyl substances (PFAS) contamination in groundwater of Kamrup, Assam, India: occurrence, health risks, and metabolomic insights
Source: Royal Society of Chemistry journal article supplement (doi:10.1039/d4em00159a), 2024-01-01
Supplement: d4em00159a1.pdf [file d4em00159a1.pdf]

### **Supplementary Information**

## **Assessment of Per- and Polyfluoroalkyl Substance Exposure Risk in Drinking Water from Kamrup Region of Assam, India: Detection of PFBS and its Potential Impact on the Metabolome of Human Kidney Cells**

*Aditya Sharma<sup>1</sup>, Sachin B Jorvekar<sup>1</sup>, Sujoy Bhowmik<sup>2</sup>, Purusottam Mohapatra<sup>2</sup>, Roshan M Borkar<sup>1</sup>*

*<sup>1</sup>Department of Pharmaceutical Analysis, National Institute of Pharmaceutical Education and Research (NIPER), Guwahati, Changsari, 781101, India*

*<sup>2</sup>Department of Biotechnology, National Institute of Pharmaceutical Education and Research (NIPER), Guwahati, Changsari, 781101, India*

---

\* Corresponding Author : [roshanudps@gmail.com](mailto:roshanudps@gmail.com) (R M Borkar)

: [roshan.borkar@niperguwahati.ac.in](mailto:roshan.borkar@niperguwahati.ac.in)

**Table S1** PFAS MRM Transitions (ESI-)

| PFAS                              | Parent Ion | Daughter Ion | Collision Energy (eV) |
|-----------------------------------|------------|--------------|-----------------------|
| PFBS                              | 298.94     | 80.00*       | 40                    |
|                                   | 298.94     | 99.00        | 36                    |
| PFHxA                             | 312.97     | 269.00*      | 8                     |
|                                   | 312.97     | 119.00       | 20                    |
| PFHpA                             | 362.97     | 319.00*      | 8                     |
|                                   | 362.97     | 169.00       | 16                    |
| PFHxS                             | 398.93     | 80.00*       | 48                    |
|                                   | 398.93     | 99.00        | 40                    |
| PFOA                              | 412.96     | 370.00*      | 8                     |
|                                   | 412.96     | 169.00       | 16                    |
| PFNA                              | 462.96     | 419.00*      | 8                     |
|                                   | 462.96     | 219.00       | 16                    |
| PFOS                              | 498.93     | 80.00*       | 56                    |
|                                   | 498.93     | 99.00        | 48                    |
| PFDA                              | 512.96     | 470.00*      | 8                     |
|                                   | 512.96     | 269.00       | 20                    |
| PFDS                              | 598.92     | 80.00*       | 60                    |
|                                   | 598.92     | 99.00        | 52                    |
| PFuDA                             | 562.95     | 519.00*      | 8                     |
|                                   | 562.95     | 269.00       | 20                    |
| PFOSA                             | 497.94     | 80.00*       | 80                    |
|                                   | 497.94     | 99.00        | 48                    |
| PFDoA                             | 612.95     | 568.90*      | 8                     |
|                                   | 612.95     | 169.00       | 28                    |
| <sup>13</sup> C <sub>8</sub> PFOS | 506.99     | 80.00*       | 56                    |
|                                   | 506.99     | 99.00        | 48                    |

**Table S2** Representing Limit of detection(LOD), Limit of quantitation(LOQ) and linearity of PFAS

| <b>Compound</b> | <b>R<sup>2</sup></b> | <b>Linear range<br/>(ngmL<sup>-1</sup>)</b> | <b>LOD<br/>(ngmL<sup>-1</sup>)</b> | <b>LOQ<br/>(ngmL<sup>-1</sup>)</b> |
|-----------------|----------------------|---------------------------------------------|------------------------------------|------------------------------------|
| <b>PFBS</b>     | 0.99                 | 0.1~100                                     | 0.1                                | 0.5                                |
| <b>PFHxA</b>    | 0.99                 | 0.5~200                                     | 0.1                                | 0.5                                |
| <b>PFHpA</b>    | 0.99                 | 5.0~200                                     | 0.1                                | 5.0                                |
| <b>PFHxS</b>    | 0.99                 | 1.0~200                                     | 0.1                                | 1.0                                |
| <b>PFOA</b>     | 0.99                 | 1.0~200                                     | 0.1                                | 1.0                                |
| <b>PFNA</b>     | 0.99                 | 0.5~200                                     | 0.1                                | 0.5                                |
| <b>PFOS</b>     | 0.99                 | 0.1~200                                     | 0.1                                | 0.5                                |
| <b>PFDA</b>     | 0.99                 | 1.0~200                                     | 0.1                                | 1.0                                |
| <b>PFDS</b>     | 0.99                 | 0.5~200                                     | 0.1                                | 0.5                                |
| <b>PFuDA</b>    | 0.99                 | 0.5~200                                     | 0.1                                | 0.5                                |
| <b>PFOSA</b>    | 0.99                 | 0.5~200                                     | 0.1                                | 0.5                                |
| <b>PFDoA</b>    | 0.99                 | 1.0~200                                     | 0.1                                | 1.0                                |

**Table S3** Accuracy and precision values for the developed LC-MS/MS Method ( $n = 3$ , Mean  $\pm$  SD)

| Analyte | QC Samples | Nominal Conc. (ngmL <sup>-1</sup> ) | Intra-day                              |              |                  | Inter-day                              |              |                  |
|---------|------------|-------------------------------------|----------------------------------------|--------------|------------------|----------------------------------------|--------------|------------------|
|         |            |                                     | Calculated Conc. (ngmL <sup>-1</sup> ) | Accuracy (%) | Precision (%RSD) | Calculated Conc. (ngmL <sup>-1</sup> ) | Accuracy (%) | Precision (%RSD) |
| PFBS    | LQC        | 0.10                                | 0.10                                   | 100.47±0.00  | 2.00             | 0.10                                   | 98.99±0.00   | 1.94             |
|         | MQC        | 5.00                                | 5.05                                   | 101.15±0.10  | 1.99             | 5.17                                   | 101.29±0.10  | 1.84             |
|         | HQC        | 50.00                               | 51.24                                  | 102.48±1.03  | 2.00             | 50.98                                  | 102.35±0.92  | 1.79             |
| PFHxA   | LQC        | 1.00                                | 0.88                                   | 88.35±0.02   | 1.96             | 0.88                                   | 88.32±0.02   | 1.90             |
|         | MQC        | 25.00                               | 27.17                                  | 108.71±0.51  | 1.89             | 26.74                                  | 108.84±0.50  | 1.85             |
|         | HQC        | 100.00                              | 102.56                                 | 102.56±2.01  | 1.96             | 104.58                                 | 102.6±1.96   | 1.91             |
| PFHpA   | LQC        | 10.00                               | 11.01                                  | 110.13±0.19  | 1.71             | 10.85                                  | 110.29±0.22  | 1.96             |
|         | MQC        | 25.00                               | 26.09                                  | 104.39±0.47  | 1.79             | 25.59                                  | 104.66±0.50  | 1.91             |
|         | HQC        | 100.00                              | 104.23                                 | 104.23±1.90  | 1.83             | 106.41                                 | 104.31±1.82  | 1.74             |
| PFHxS   | LQC        | 5.00                                | 5.33                                   | 106.69±0.07  | 1.31             | 5.36                                   | 108.69±0.11  | 1.95             |
|         | MQC        | 25.00                               | 26.16                                  | 104.66±0.52  | 1.99             | 26.64                                  | 104.52±0.52  | 1.98             |
|         | HQC        | 100.00                              | 99.80                                  | 99.81±1.08   | 1.08             | 100.28                                 | 100.14±0.51  | 0.51             |
| PFOA    | LQC        | 5.00                                | 5.05                                   | 100.94±0.06  | 1.23             | 5.09                                   | 102.61±0.08  | 1.62             |
|         | MQC        | 10.00                               | 12.00                                  | 120.02±0.23  | 1.90             | 12.24                                  | 120.34±0.23  | 1.92             |
|         | HQC        | 100.00                              | 100.53                                 | 100.53±0.27  | 0.27             | 100.23                                 | 101.19±1.38  | 1.36             |
| PFNA    | LQC        | 1.00                                | 1.02                                   | 101.97±0.02  | 1.76             | 1.03                                   | 102.71±0.01  | 0.67             |
|         | MQC        | 50.00                               | 51.50                                  | 103.00±0.87  | 1.69             | 52.50                                  | 103.67±0.77  | 1.49             |
|         | HQC        | 200.00                              | 202.67                                 | 101.33±2.40  | 1.18             | 202.99                                 | 100.67±1.49  | 0.74             |
| PFOS    | LQC        | 1.00                                | 0.91                                   | 90.79±0.02   | 1.93             | 0.89                                   | 90.46±0.01   | 1.35             |
|         | MQC        | 50.00                               | 48.56                                  | 97.11±0.88   | 1.82             | 47.54                                  | 97.25±0.96   | 1.97             |
|         | HQC        | 200.00                              | 199.26                                 | 99.63±3.76   | 1.89             | 200.70                                 | 100.30±1.55  | 0.77             |
| PFDA    | LQC        | 5.00                                | 5.09                                   | 101.86±0.10  | 1.95             | 5.19                                   | 101.39±0.11  | 2.08             |
|         | MQC        | 50.00                               | 52.35                                  | 104.71±0.85  | 1.63             | 51.46                                  | 104.98±1.04  | 2.00             |
|         | HQC        | 100.00                              | 101.37                                 | 101.37±1.93  | 1.90             | 100.45                                 | 100.04±0.43  | 0.43             |
| PFDS    | LQC        | 5.00                                | 4.99                                   | 99.89±0.10   | 2.02             | 5.09                                   | 100.56±0.06  | 1.11             |
|         | MQC        | 50.00                               | 50.89                                  | 101.78±0.74  | 1.45             | 50.18                                  | 101.51±0.54  | 1.06             |
|         | HQC        | 200.00                              | 199.10                                 | 99.55±3.46   | 1.74             | 197.08                                 | 99.05±1.73   | 0.87             |
| PFuDA   | LQC        | 1.00                                | 1.03                                   | 103.38±0.02  | 1.78             | 1.05                                   | 104.38±0.01  | 1.10             |
|         | MQC        | 50.00                               | 53.42                                  | 106.83±1.01  | 1.89             | 52.90                                  | 104.55±0.97  | 1.86             |
|         | HQC        | 100.00                              | 98.90                                  | 98.90±1.41   | 1.42             | 97.99                                  | 98.57±0.83   | 0.84             |
| PFOSA   | LQC        | 1.00                                | 1.08                                   | 107.81±0.02  | 1.39             | 1.06                                   | 108.58±0.02  | 1.85             |
|         | MQC        | 25.00                               | 25.97                                  | 103.88±0.19  | 0.75             | 25.75                                  | 104.76±0.53  | 2.01             |
|         | HQC        | 100.00                              | 103.09                                 | 103.09±1.85  | 1.79             | 101.92                                 | 102.09±0.15  | 0.15             |
| PFDoA   | LQC        | 5.00                                | 5.51                                   | 110.14±0.08  | 1.38             | 5.45                                   | 109.61±0.10  | 1.87             |
|         | MQC        | 50.00                               | 48.72                                  | 97.45±0.18   | 0.37             | 48.93                                  | 98.11±0.52   | 1.07             |
|         | HQC        | 200.00                              | 198.65                                 | 99.32±3.95   | 1.99             | 201.45                                 | 99.82±2.26   | 1.13             |

LQC = Lower Quality Control, MQC = Middle Quality Control, HQC = Higher Quality Control, RSD = Relative Standard Deviation (%)

*Table S4 Concentration (ngL-1) of PFAS analogues in underground water samples collected from Kamrup region of Assam, India*

| Sample No. | Sample Region | PFBS    | PFHxA | PFHpA | PFHxS | PFOA  | PFNA | PFOS  | PFDA | PFDS | PFuDA | PFOSA | PFDoA |
|------------|---------------|---------|-------|-------|-------|-------|------|-------|------|------|-------|-------|-------|
| 1          | Metro         | nd      | 1.77  | 17.68 | 8.84  | 21.56 | 1.77 | 10.64 | 8.84 | 1.77 | 1.77  | 1.77  | 8.84  |
| 2          | Metro         | 39.48   | 1.77  | 17.68 | 8.84  | 8.84  | 1.77 | 10.17 | 8.84 | 8.24 | nd    | nd    | 8.84  |
| 3          | Rural         | nd      | 1.77  | 17.68 | 8.84  | 8.84  | 1.77 | 9.17  | 8.84 | 5.82 | 1.77  | nd    | 8.84  |
| 4          | Metro         | nd      | 4.16  | nd    | 8.84  | 8.84  | 1.77 | 10.01 | 8.84 | 6.69 | 1.77  | nd    | 8.84  |
| 5          | Metro         | nd      | 1.77  | 17.68 | 8.84  | 0.00  | 1.77 | 9.30  | 8.84 | 4.61 | 1.77  | nd    | 8.84  |
| 6          | Metro         | 1129.21 | 4.47  | nd    | nd    | 15.59 | 1.77 | 7.76  | 8.84 | nd   | nd    | nd    | 8.84  |
| 7          | Metro         | 77.92   | 1.77  | 17.68 | nd    | 8.84  | 3.09 | 8.56  | 8.84 | 1.77 | nd    | nd    | nd    |
| 8          | Rural         | 1.77    | 6.56  | 17.68 | nd    | 8.84  | 1.77 | 10.09 | 8.84 | 1.77 | 1.77  | nd    | nd    |
| 9          | Metro         | 1.77    | 8.92  | 17.68 | 8.84  | 19.32 | 1.77 | 9.29  | 8.84 | 1.77 | nd    | nd    | 8.84  |
| 10         | Rural         | 1.77    | 9.34  | nd    | 8.84  | 14.61 | 1.77 | 10.16 | 8.84 | 1.77 | nd    | nd    | nd    |
| 11         | Metro         | 1.77    | 1.77  | 17.68 | nd    | 8.84  | 1.77 | 10.63 | 8.84 | 1.77 | nd    | nd    | nd    |
| 12         | Metro         | 119.21  | 1.77  | 17.68 | 8.84  | 17.56 | 1.77 | 9.67  | 8.84 | nd   | nd    | nd    | nd    |
| 13         | Rural         | nd      | 1.77  | 17.68 | 8.84  | 8.84  | 1.77 | 9.12  | 8.84 | 1.77 | nd    | nd    | nd    |
| 14         | Rural         | nd      | 1.77  | 17.68 | nd    | 8.84  | 4.38 | 19.80 | 8.84 | 1.77 | 1.77  | nd    | nd    |
| 15         | Metro         | 1.77    | 16.04 | 17.68 | 8.84  | 8.84  | 1.77 | 11.71 | 8.84 | 1.77 | nd    | nd    | nd    |
| 16         | Rural         | nd      | 1.77  | 17.68 | nd    | 15.56 | 3.15 | 8.90  | 8.84 | 1.77 | 1.77  | nd    | nd    |
| 17         | Metro         | nd      | 2.69  | 17.68 | 8.84  | 19.63 | 3.06 | 9.47  | 8.84 | 1.77 | 1.77  | nd    | nd    |
| 18         | Metro         | 71.52   | 9.53  | 17.68 | 8.84  | 8.84  | 3.23 | 27.94 | 8.84 | 1.77 | nd    | nd    | nd    |

|    |       |        |       |       |      |       |      |       |      |      |      |    |    |
|----|-------|--------|-------|-------|------|-------|------|-------|------|------|------|----|----|
| 19 | Metro | nd     | 3.15  | 0.00  | 0.00 | 14.28 | 1.77 | 8.16  | 0.00 | 1.77 | nd   | nd | nd |
| 20 | Metro | 9.08   | 10.91 | 17.68 | 8.84 | 8.84  | 1.77 | 11.44 | 8.84 | 1.77 | 1.77 | nd | nd |
| 21 | Metro | 98.41  | 2.76  | nd    | nd   | 13.55 | 1.77 | 8.54  | nd   | 3.31 | nd   | nd | nd |
| 22 | Metro | nd     | 8.04  | 17.68 | 8.84 | 8.84  | 1.77 | 8.67  | 8.84 | 6.99 | 1.77 | nd | nd |
| 23 | Metro | nd     | 1.77  | nd    | 8.84 | 8.84  | 3.41 | 10.31 | nd   | 4.59 | 1.77 | nd | nd |
| 24 | Metro | nd     | 44.04 | 17.68 | nd   | 8.84  | 1.77 | 8.76  | nd   | 4.03 | 1.77 | nd | nd |
| 25 | Rural | 119.07 | 9.27  | 17.68 | nd   | 14.81 | 3.57 | 6.91  | 8.84 | 6.60 | 1.77 | nd | nd |
| 26 | Rural | nd     | 1.77  | 17.68 | nd   | 0.00  | 1.77 | 8.75  | 8.84 | 1.77 | nd   | nd | nd |
| 27 | Rural | 154.83 | 10.37 | 17.68 | 8.84 | 8.84  | 1.77 | 8.71  | nd   | 1.77 | nd   | nd | nd |
| 28 | Rural | nd     | 1.77  | nd    | nd   | 8.84  | 1.77 | 9.42  | nd   | 0.87 | 1.77 | nd | nd |
| 29 | Metro | 2.16   | 1.77  | 17.68 | 8.84 | 15.11 | 1.77 | 8.22  | 8.84 | 7.12 | 1.77 | nd | nd |
| 30 | Rural | nd     | 1.77  | 17.68 | 8.84 | 8.84  | 1.77 | 10.46 | 8.84 | 1.77 | nd   | nd | nd |
| 31 | Rural | nd     | 2.76  | 17.68 | nd   | 8.84  | 3.19 | 3.26  | nd   | 2.65 | nd   | nd | nd |
| 32 | Rural | 192.57 | 1.77  | 17.68 | 8.84 | 8.84  | 1.77 | 9.06  | nd   | 3.41 | 1.77 | nd | nd |
| 33 | Rural | 221.88 | 3.23  | 17.68 | nd   | 14.11 | 1.77 | 7.68  | 8.84 | 1.77 | 1.77 | nd | nd |
| 34 | Rural | 106.46 | 1.77  | 17.68 | nd   | 8.84  | 1.94 | 8.18  | nd   | 2.67 | 1.77 | nd | nd |
| 35 | Rural | 237.08 | 1.77  | 17.68 | nd   | 8.84  | 1.77 | 7.63  | 8.84 | 2.75 | 1.77 | nd | nd |
| 36 | Rural | 147.99 | 1.77  | 17.68 | 8.84 | 8.84  | 1.77 | 8.96  | nd   | 4.96 | nd   | nd | nd |
| 37 | Metro | 143.68 | 1.77  | nd    | nd   | 13.27 | 1.77 | 8.82  | 8.84 | 1.77 | 1.77 | nd | nd |
| 38 | Rural | 8.66   | 1.77  | 17.68 | nd   | 21.72 | 1.77 | 7.13  | nd   | 3.53 | 1.77 | nd | nd |
| 39 | Metro | 8.71   | 3.73  | 17.68 | 8.84 | 8.84  | 1.77 | 11.04 | 8.84 | 3.04 | nd   | nd | nd |

|    |       |        |       |       |      |       |      |       |      |       |      |      |      |
|----|-------|--------|-------|-------|------|-------|------|-------|------|-------|------|------|------|
| 40 | Metro | 7.54   | 15.41 | 17.68 | 8.84 | 8.84  | 1.77 | 9.07  | nd   | 1.77  | nd   | nd   | nd   |
| 41 | Metro | 558.03 | nd    | 17.68 | 8.84 | 0.00  | 1.77 | 40.97 | 8.84 | 1.77  | nd   | nd   | nd   |
| 42 | Metro | 107.71 | 1.77  | nd    | 8.84 | 16.10 | 1.77 | 1.91  | nd   | nd    | nd   | nd   | nd   |
| 43 | Rural | nd     | 10.02 | 17.68 | nd   | 16.25 | 1.77 | 8.35  | 8.84 | 1.77  | 1.77 | nd   | nd   |
| 44 | Metro | nd     | 1.77  | nd    | 8.84 | 25.71 | 1.77 | 1.95  | 8.84 | 1.77  | 1.77 | 1.77 | 8.84 |
| 45 | Metro | 14.67  | 4.42  | 17.68 | 8.84 | 8.84  | 1.77 | 8.95  | 8.84 | 10.76 | 1.77 | nd   | 8.84 |
| 46 | Rural | nd     | 5.71  | nd    | nd   | 8.84  | 1.77 | 9.65  | 8.84 | 4.42  | nd   | nd   | 8.84 |
| 47 | Metro | 1.77   | 5.04  | 17.68 | nd   | 8.84  | 1.77 | 9.61  | 8.84 | 2.60  | 1.77 | nd   | nd   |
| 48 | Metro | 30.97  | 18.62 | 17.68 | nd   | 0.00  | 1.77 | 9.47  | 8.84 | 1.77  | 1.77 | nd   | nd   |
| 49 | Rural | nd     | 1.77  | 17.68 | nd   | 25.18 | 1.77 | 9.00  | 8.84 | 1.77  | nd   | nd   | nd   |
| 50 | Rural | nd     | 1.77  | 17.68 | nd   | 14.62 | 1.77 | 9.23  | 8.84 | 1.77  | 1.77 | nd   | nd   |
| 51 | Metro | nd     | 1.77  | nd    | 8.84 | 19.29 | 1.77 | 0.69  | 0.00 | 1.77  | nd   | nd   | nd   |
| 52 | Rural | 148.39 | 46.72 | 17.68 | nd   | 18.86 | 1.77 | 0.55  | 8.84 | 1.77  | nd   | nd   | nd   |
| 53 | Metro | 182.12 | 0.00  | 17.68 | 8.84 | 8.84  | 1.77 | 10.45 | 8.84 | 1.77  | nd   | nd   | nd   |
| 54 | Metro | 14.99  | 26.60 | 17.68 | nd   | 17.08 | 1.77 | 9.10  | 8.84 | 1.77  | 1.77 | nd   | nd   |
| 55 | Metro | nd     | 3.88  | nd    | nd   | 8.84  | 1.77 | 10.80 | 0.00 | 1.77  | nd   | nd   | nd   |
| 56 | Rural | 224.47 | 8.55  | 17.68 | 8.84 | 17.02 | 1.77 | 9.31  | 8.84 | nd    | nd   | nd   | nd   |
| 57 | Rural | nd     | 17.57 | 17.68 | nd   | 15.25 | 1.77 | 10.12 | 8.84 | 4.98  | nd   | nd   | nd   |
| 58 | Rural | 129.56 | 1.77  | 17.68 | nd   | 8.84  | 1.77 | 7.33  | 8.84 | 1.77  | nd   | nd   | nd   |
| 59 | Rural | 7.00   | 13.20 | 17.68 | nd   | 21.77 | 1.77 | 9.07  | 8.84 | 1.77  | nd   | nd   | nd   |
| 60 | Metro | 148.43 | 3.42  | 17.68 | 8.84 | 8.84  | 1.77 | 2.52  | 8.84 | 1.77  | nd   | nd   | nd   |

|    |       |        |      |       |      |       |      |      |      |      |    |    |      |
|----|-------|--------|------|-------|------|-------|------|------|------|------|----|----|------|
| 61 | Rural | 160.72 | 1.77 | nd    | nd   | 14.84 | 1.77 | 7.23 | 8.84 | 1.77 | nd | nd | nd   |
| 62 | Metro | 265.57 | 1.77 | 17.68 | 8.84 | 16.61 | 3.67 | 9.31 | 8.84 | 1.77 | nd | nd | nd   |
| 63 | Rural | nd     | 4.48 | 17.68 | nd   | nd    | 1.77 | 2.91 | 8.84 | nd   | nd | nd | nd   |
| 64 | Metro | nd     | 1.77 | nd    | nd   | 21.21 | 1.77 | 2.77 | 8.84 | 1.77 | nd | nd | 8.84 |
| 65 | Rural | 149.65 | 1.77 | nd    | nd   | 8.84  | 1.77 | 7.42 | 8.84 | 1.77 | nd | nd | 0.00 |

---



*Table S5 Descriptive statistics of underground water samples from Kamrup region of Assam, India*

| <b>Compound</b> | <b>N total</b> | <b>Mean (ngL<sup>-1</sup>)</b> | <b>Minimum (ngL<sup>-1</sup>)</b> | <b>Median (ngL<sup>-1</sup>)</b> | <b>Maximum (ngL<sup>-1</sup>)</b> | <b>P95 (ngL<sup>-1</sup>)</b> | <b>DF(%)</b> |
|-----------------|----------------|--------------------------------|-----------------------------------|----------------------------------|-----------------------------------|-------------------------------|--------------|
| <b>PFBS</b>     | 65             | 77.67                          | nd                                | 2.16                             | 1129.21                           | 237.08                        | 60.00        |
| <b>PFHxA</b>    | 65             | 6.13                           | nd                                | 1.77                             | 46.72                             | 18.62                         | 96.92        |
| <b>PFHpA</b>    | 65             | 13.33                          | nd                                | 17.68                            | 17.68                             | 17.68                         | 75.38        |
| <b>PFHxS</b>    | 65             | 4.22                           | nd                                | nd                               | 8.84                              | 8.84                          | 47.69        |
| <b>PFOA</b>     | 65             | 11.90                          | nd                                | 8.84                             | 25.71                             | 21.72                         | 92.30        |
| <b>PFNA</b>     | 65             | 2.00                           | 1.77                              | 1.77                             | 4.38                              | 3.41                          | 100.00       |
| <b>PFOS</b>     | 65             | 9.23                           | 0.55                              | 9.07                             | 40.97                             | 11.71                         | 100.00       |
| <b>PFDA</b>     | 65             | 6.80                           | nd                                | 8.84                             | 8.84                              | 8.84                          | 76.92        |
| <b>PFDS</b>     | 65             | 2.64                           | nd                                | 1.77                             | 10.76                             | 6.99                          | 92.30        |
| <b>PFuDA</b>    | 65             | 0.76                           | nd                                | nd                               | 1.77                              | 1.77                          | 43.07        |
| <b>PFOSA</b>    | 65             | 0.05                           | nd                                | nd                               | 1.77                              | nd                            | 3.07         |
| <b>PFDoA</b>    | 65             | 1.50                           | nd                                | nd                               | 8.84                              | 8.84                          | 16.92        |
| <b>∑ PFAS</b>   | /              | 136.23                         | 2.32                              | 51.90                            | 1305.49                           | 345.50                        | /            |

P95 = 95<sup>th</sup> Percentile, DF = Detection frequency (%), nd = non-detected

*Table S6 Descriptive statistics of underground water samples from Kamrup metro, Assam, India*

| <b>Compound</b> | <b>N total</b> | <b>Mean<br/>(ngL<sup>-1</sup>)</b> | <b>Minimum<br/>(ngL<sup>-1</sup>)</b> | <b>Median<br/>(ngL<sup>-1</sup>)</b> | <b>Maximum<br/>(ngL<sup>-1</sup>)</b> | <b>P95<br/>(ngL<sup>-1</sup>)</b> | <b>DF(%)</b> |
|-----------------|----------------|------------------------------------|---------------------------------------|--------------------------------------|---------------------------------------|-----------------------------------|--------------|
| <b>PFBS</b>     | 35             | 86.76                              | nd                                    | 7.54                                 | 1129.21                               | 353.31                            | 65.71        |
| <b>PFHxA</b>    | 35             | 6.30                               | nd                                    | 2.76                                 | 44.04                                 | 21.01                             | 94.28        |
| <b>PFHpA</b>    | 35             | 12.12                              | nd                                    | 17.68                                | 17.68                                 | 17.68                             | 68.57        |
| <b>PFHxS</b>    | 35             | 5.81                               | nd                                    | 8.84                                 | 8.84                                  | 8.84                              | 65.71        |
| <b>PFOA</b>     | 35             | 11.89                              | nd                                    | 8.84                                 | 25.71                                 | 21.31                             | 91.42        |
| <b>PFNA</b>     | 35             | 1.99                               | 1.77                                  | 1.77                                 | 3.67                                  | 3.28                              | 100.00       |
| <b>PFOS</b>     | 35             | 9.91                               | 0.69                                  | 9.30                                 | 40.97                                 | 16.58                             | 100.00       |
| <b>PFDA</b>     | 35             | 6.82                               | nd                                    | 8.84                                 | 8.84                                  | 8.84                              | 77.14        |
| <b>PFDS</b>     | 35             | 2.83                               | nd                                    | 1.77                                 | 10.76                                 | 7.45                              | 91.42        |
| <b>PFuDA</b>    | 35             | 0.76                               | nd                                    | nd                                   | 1.77                                  | 1.77                              | 42.85        |
| <b>PFOSA</b>    | 35             | 0.10                               | nd                                    | nd                                   | 1.77                                  | 0.53                              | 5.71         |
| <b>PFDoA</b>    | 35             | 2.27                               | nd                                    | nd                                   | 8.84                                  | 8.84                              | 25.71        |
| <b>∑ PFAS</b>   | /              | 147.56                             | 2.46                                  | 67.34                                | 1302.10                               | 469.45                            | /            |

P95 = 95<sup>th</sup> Percentile, DF = Detection frequency (%), nd = non-detected

*Table S7 Descriptive statistics of underground water samples from Kamrup rural, Assam, India*

| <b>Compound</b> | <b>N total</b> | <b>Mean<br/>(ngL<sup>-1</sup>)</b> | <b>Minimum<br/>(ngL<sup>-1</sup>)</b> | <b>Median<br/>(ngL<sup>-1</sup>)</b> | <b>Maximum<br/>(ngL<sup>-1</sup>)</b> | <b>P95<br/>(ngL<sup>-1</sup>)</b> | <b>DF(%)</b> |
|-----------------|----------------|------------------------------------|---------------------------------------|--------------------------------------|---------------------------------------|-----------------------------------|--------------|
| <b>PFBS</b>     | 30             | 67.06                              | nd                                    | 1.77                                 | 237.08                                | 223.30                            | 53.33        |
| <b>PFHxA</b>    | 30             | 5.93                               | 1.77                                  | 1.77                                 | 46.72                                 | 15.61                             | 100.00       |
| <b>PFHpA</b>    | 30             | 14.73                              | nd                                    | 17.68                                | 17.68                                 | 17.68                             | 83.33        |
| <b>PFHxS</b>    | 30             | 2.36                               | nd                                    | nd                                   | 8.84                                  | 8.84                              | 26.67        |
| <b>PFOA</b>     | 30             | 11.91                              | nd                                    | 8.84                                 | 25.18                                 | 21.75                             | 93.33        |
| <b>PFNA</b>     | 30             | 2.01                               | 1.77                                  | 1.77                                 | 4.38                                  | 3.40                              | 100.00       |
| <b>PFOS</b>     | 30             | 8.45                               | 0.55                                  | 8.93                                 | 19.80                                 | 10.32                             | 100.00       |
| <b>PFDA</b>     | 30             | 6.78                               | nd                                    | 8.84                                 | 8.84                                  | 8.84                              | 76.67        |
| <b>PFDS</b>     | 30             | 2.42                               | nd                                    | 1.77                                 | 6.60                                  | 5.44                              | 93.33        |
| <b>PFuDA</b>    | 30             | 0.77                               | nd                                    | nd                                   | 1.77                                  | 1.77                              | 43.33        |
| <b>PFOSA</b>    | 30             | nd                                 | nd                                    | nd                                   | nd                                    | nd                                | nd           |
| <b>PFDoA</b>    | 30             | 0.59                               | nd                                    | nd                                   | 8.84                                  | 4.86                              | 6.67         |
| <b>∑ PFAS</b>   | /              | 123.01                             | 4.09                                  | 51.37                                | 385.73                                | 321.82                            | /            |

P95 = 95<sup>th</sup> Percentile, DF = Detection frequency (%), nd = non-detected

*Table S8 Estimated Daily Intake (EDI, ngkg-1bw d-1) of PFAS in five age groups via drinking water*

| <b>Compound</b> | <b>Men</b> | <b>Women</b> | <b>Children</b> | <b>Boys</b> | <b>Girls</b> |
|-----------------|------------|--------------|-----------------|-------------|--------------|
| <b>PFBS</b>     | 3.50       | 3.07         | 4.66            | 4.16        | 3.42         |
| <b>PFHxA</b>    | 0.28       | 0.24         | 0.37            | 0.33        | 0.27         |
| <b>PFHpA</b>    | 0.60       | 0.53         | 0.80            | 0.71        | 0.59         |
| <b>PFHxS</b>    | 0.19       | 0.17         | 0.25            | 0.23        | 0.19         |
| <b>PFOA</b>     | 0.54       | 0.47         | 0.71            | 0.64        | 0.52         |
| <b>PFNA</b>     | 0.09       | 0.08         | 0.12            | 0.11        | 0.09         |
| <b>PFOS</b>     | 0.42       | 0.36         | 0.55            | 0.49        | 0.41         |
| <b>PFDA</b>     | 0.31       | 0.27         | 0.41            | 0.36        | 0.30         |
| <b>PFDS</b>     | 0.12       | 0.10         | 0.16            | 0.14        | 0.12         |
| <b>PFuDA</b>    | 0.03       | 0.03         | 0.05            | 0.04        | 0.03         |
| <b>PFOSA</b>    | 0.00       | 0.00         | 0.00            | 0.00        | 0.00         |
| <b>PFDoA</b>    | 0.07       | 0.06         | 0.09            | 0.08        | 0.07         |
| <b>∑PFAS</b>    | 6.13       | 5.38         | 8.17            | 7.29        | 5.99         |

*Table S9 Hazard Quotient (HQ) of each PFAS for the five age groups*

| <b>Compound</b> | <b>Men</b> | <b>Women</b> | <b>Children</b> | <b>Boys</b> | <b>Girls</b> |
|-----------------|------------|--------------|-----------------|-------------|--------------|
| PFBS            | 0.17       | 0.15         | 0.23            | 0.21        | 0.17         |
| PFHxA           | 0.01       | 0.01         | 0.02            | 0.02        | 0.01         |
| PFHpA           | 0.03       | 0.03         | 0.04            | 0.04        | 0.03         |
| PFHxS           | 0.01       | 0.01         | 0.01            | 0.01        | 0.01         |
| PFOA            | 0.03       | 0.02         | 0.04            | 0.03        | 0.03         |
| PFNA            | 0.00       | 0.00         | 0.01            | 0.01        | 0.00         |
| PFOS            | 0.02       | 0.02         | 0.03            | 0.02        | 0.02         |
| PFDA            | 0.02       | 0.01         | 0.02            | 0.02        | 0.01         |
| PFDS            | 0.01       | 0.01         | 0.01            | 0.01        | 0.01         |
| PFuDA           | 0.00       | 0.00         | 0.00            | 0.00        | 0.00         |
| PFOSA           | 0.00       | 0.00         | 0.00            | 0.00        | 0.00         |
| PFDoA           | 0.00       | 0.00         | 0.00            | 0.00        | 0.00         |
| $\Sigma$ HQ     | 0.31       | 0.27         | 0.41            | 0.36        | 0.30         |

**Table S10** Top significant metabolite observed in volcano plot

| <b>Metabolites</b>                                | <b>log2(FC)</b> | <b>p.adjusted</b> |
|---------------------------------------------------|-----------------|-------------------|
| PE(18:3(6Z,9Z,12Z)/P-18:1(11Z))                   | -20.71          | 0.000228          |
| PS(18:0/20:0)                                     | -20.611         | 0.000228          |
| PE(14:0/22:2(13Z,16Z))                            | -19.84          | 0.000228          |
| LysoPC(18:0)                                      | -21.129         | 0.000283          |
| Varanic acid                                      | -21.333         | 0.000378          |
| D-Erythroascorbic acid 1'-a-D-xylopyranoside      | -22.286         | 0.000591          |
| LysoPC(17:0)                                      | -21.228         | 0.000591          |
| Ganglioside GM3 (d18:1/18:1(11Z))                 | -21.174         | 0.000591          |
| 10,20-Dihydroxyeicosanoic acid                    | -20.373         | 0.000591          |
| 4-Guanidino-1-butanol                             | -21.83          | 0.000628          |
| Docosanedioic acid                                | -20.735         | 0.000686          |
| MG(18:0/0:0/0:0)                                  | -20.909         | 0.000715          |
| 3-(2,4-Cyclopentadien-1-ylidene)pregn-4-en-20-one | -21.397         | 0.001066          |
| 3-(Pyrazol-1-yl)-L-alanine                        | -22.053         | 0.001789          |
| C16 Sphinganine                                   | -20.893         | 0.014051          |
| 3L,7D,11D-phytanic acid                           | -20.274         | 0.017948          |
| dTTP / 2'-Deoxythymidine 5'-triphosphate          | 2.2511          | 0.020979          |



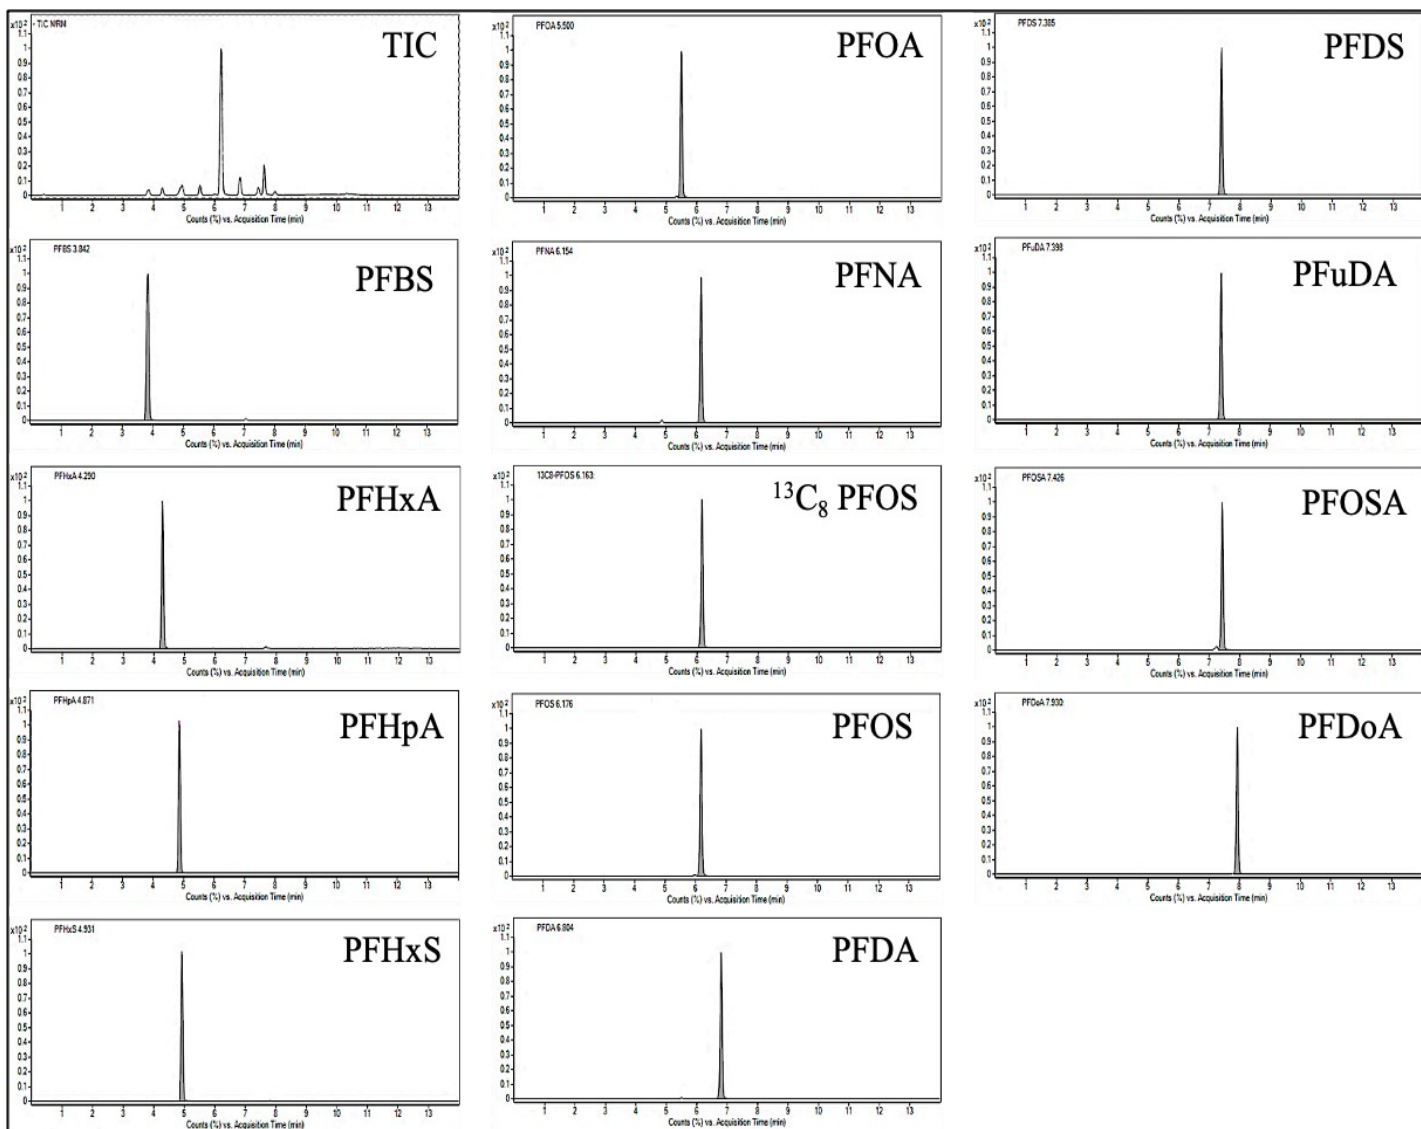

*Figure S2 LC-MS/MS chromatograms of PFAS analogues*



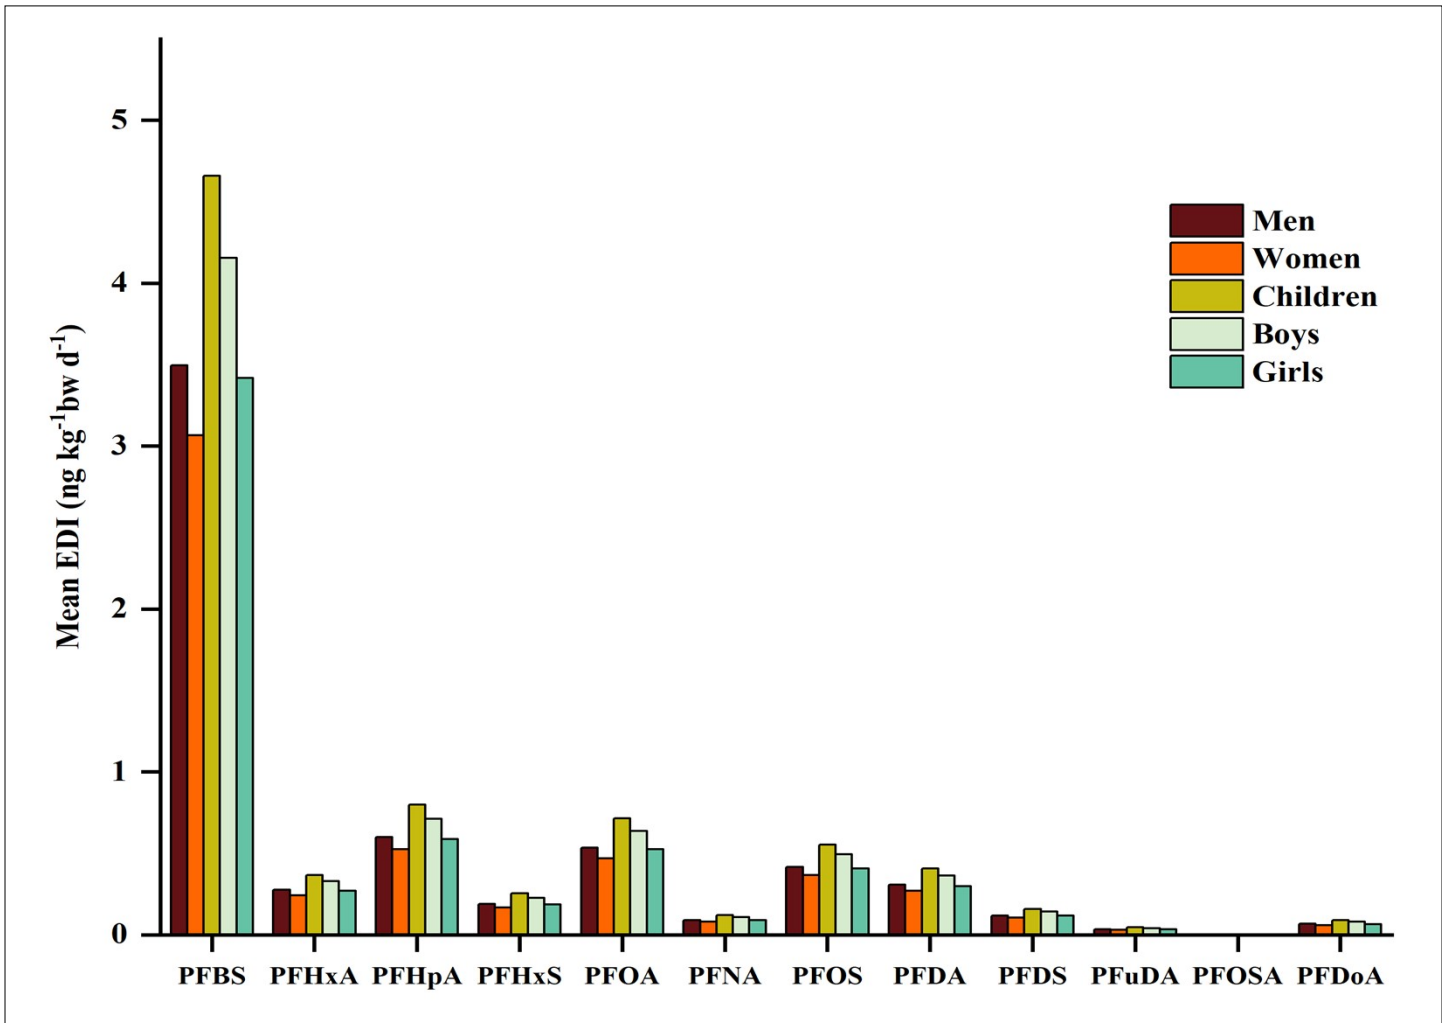

*Figure S3 Comparison of EDI, ng kg<sup>-1</sup> bw d<sup>-1</sup> of PFAS among the five age groups*

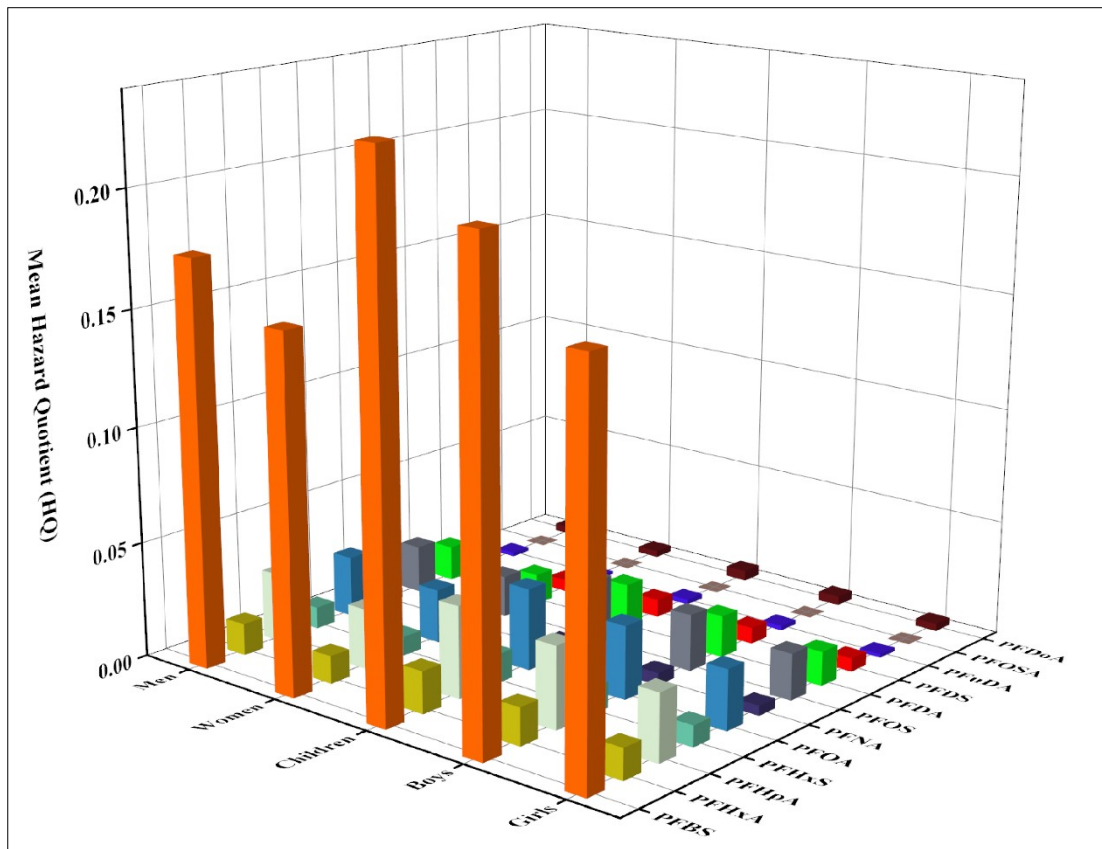

*Figure S4 Mean Hazard Quotient (HQ) for the five age groups*
